# Supplementary material for: Enhanced dimethyl methylphosphonate detection based on two-dimensional WSe2 nanosheets at room temperature
Source: Royal Society of Chemistry journal article supplement (doi:10.1039/d0an01671c), 2020-01-01
Supplement: d0an01671c1.pdf [file d0an01671c1.pdf]

## Supporting Information

### **Enhanced dimethyl methylphosphonate detection based on two-dimensional WSe<sub>2</sub> nanosheets at room temperature**

Bolong Li<sup>a</sup>, Xinwei Chen<sup>a</sup>, Chen Su<sup>a</sup>, Yutong Han<sup>a</sup>, Huaizhang Wang<sup>b</sup>, Min Zeng<sup>a,\*</sup>,  
Ying Wang<sup>a</sup>, Ting Liang<sup>b,\*</sup>, Zhi Yang<sup>a,\*</sup>, Lin Xu<sup>c,d,\*</sup>

<sup>a</sup> Key Laboratory of Thin Film and Microfabrication (Ministry of Education), Department of Micro/Nano Electronics, Center for Advanced Electronic Materials and Devices, School of Electronic Information and Electrical Engineering, Shanghai Jiao Tong University, Shanghai 200240, China.

<sup>b</sup> The Institute of NBC Defense, Beijing 102205, China

<sup>c</sup> Department of Ophthalmology, Shanghai General Hospital (Shanghai First People's Hospital), Shanghai Jiao Tong University School of Medicine; Shanghai Eye Disease Prevention & Treatment Center/Shanghai Eye Hospital; National Clinical Research Center for Eye Diseases; Shanghai Key Laboratory of Ocular Fundus Diseases; Shanghai Engineering Center for Visual Science and Photomedicine, Shanghai 200080, China.

<sup>d</sup> School of Global Health, Chinese Center for Tropical Diseases Research, Shanghai Jiao Tong University School of Medicine, Shanghai 200025, P. R. China

\*Corresponding authors. E-mail address: [linxu@sjtu.edu.cn](mailto:linxu@sjtu.edu.cn), [18511090259@163.com](mailto:18511090259@163.com), [minzeng@sjtu.edu.cn](mailto:minzeng@sjtu.edu.cn), and [zhiyang@sjtu.edu.cn](mailto:zhiyang@sjtu.edu.cn)

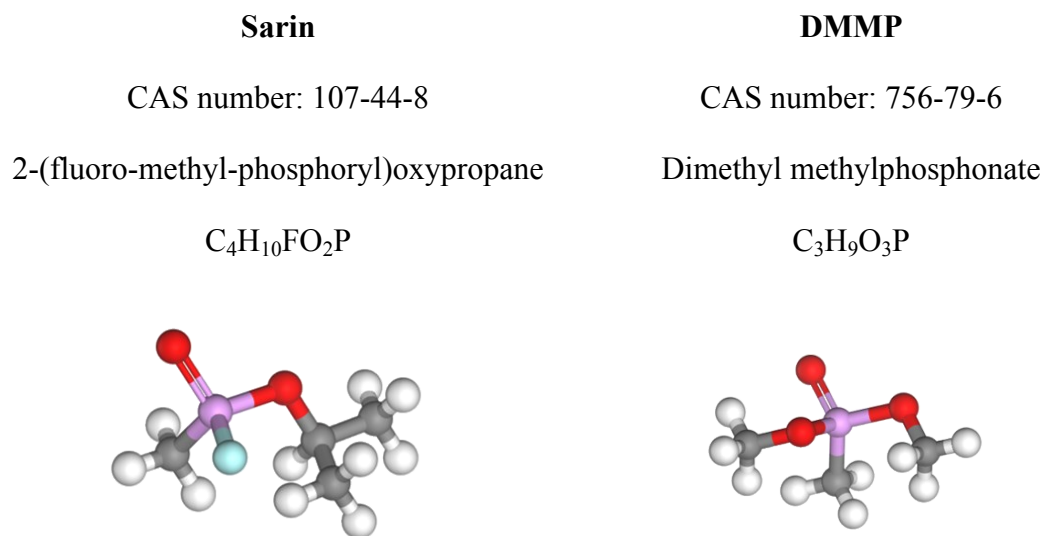

**Fig. S1.** Similarities among sarin and DMMP, as a simulant. Image key: C, grey; H, white; O, red; P, purple; F, blue.

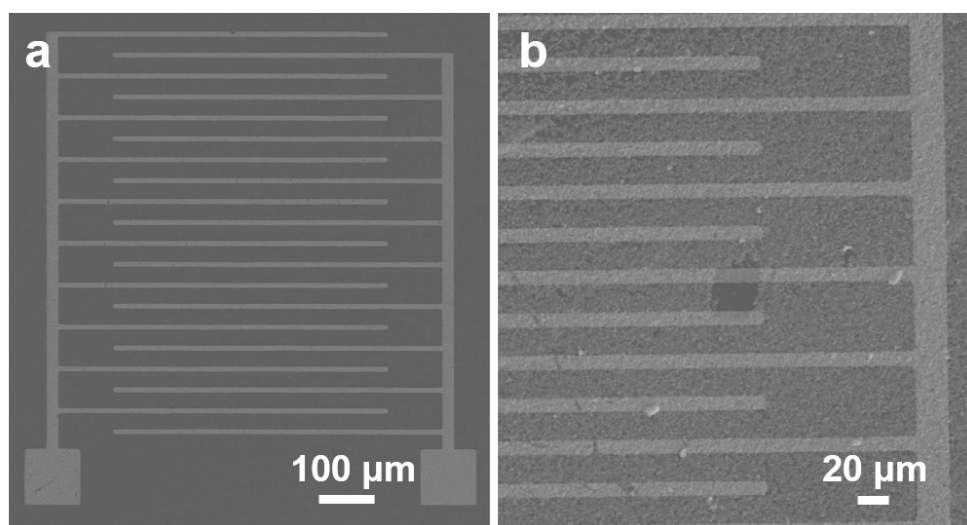

**Fig. S2.** SEM images of (a) the used interdigital electrode unit and (b) WSe<sub>2</sub> nanosheets deposited on the surface of the interdigital electrodes.

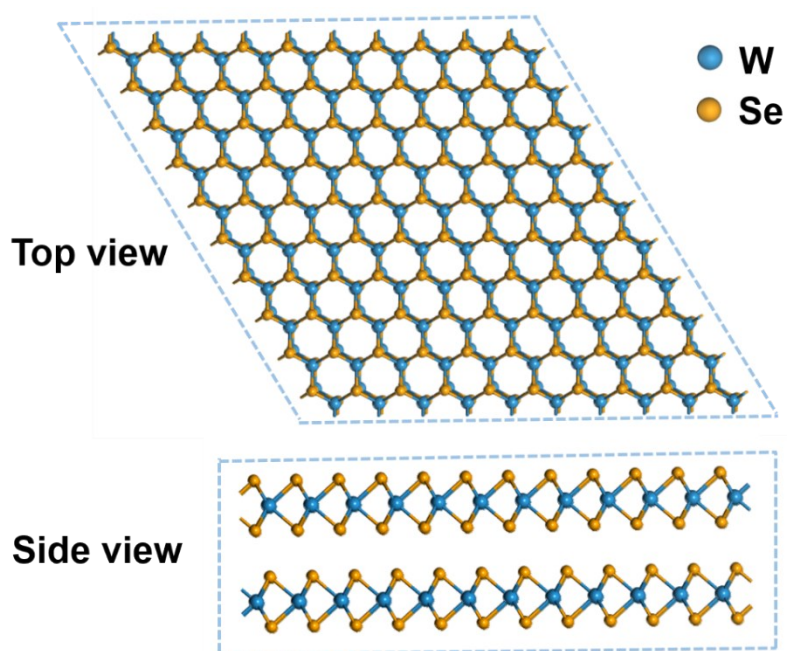

**Fig. S3.** Schematic atomic structures of WSe<sub>2</sub>.

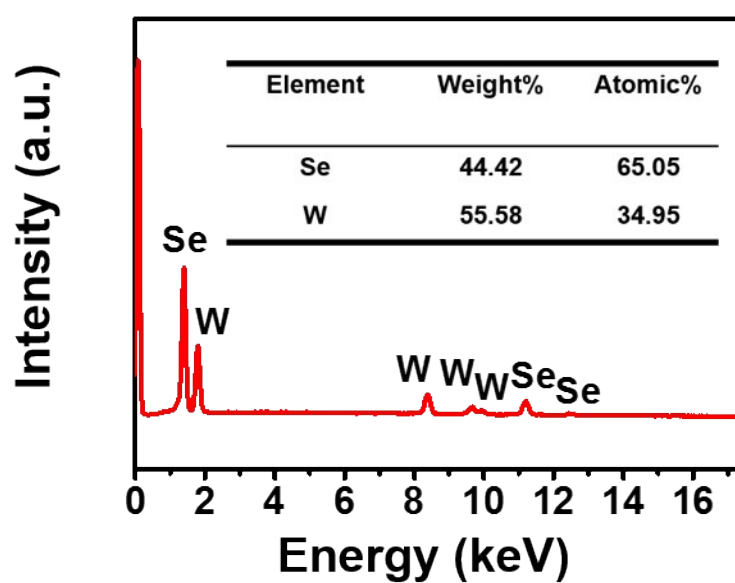

**Fig. S4.** EDS spectrum of exfoliated WSe<sub>2</sub> nanosheets.

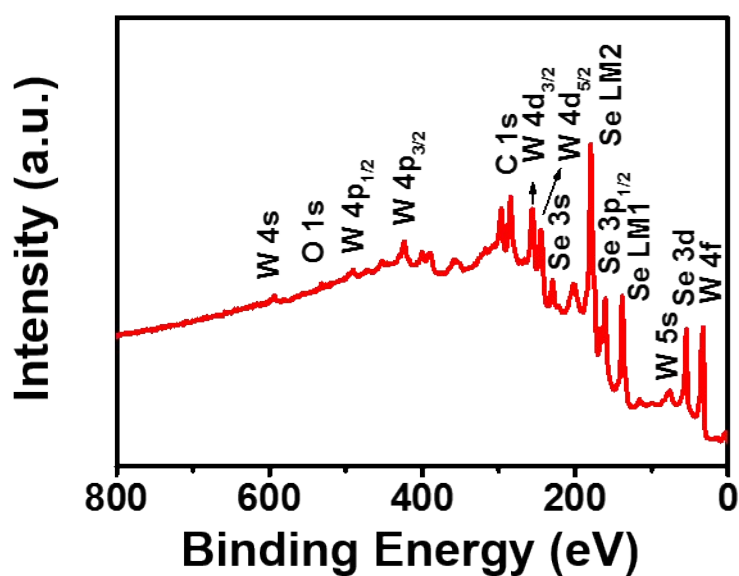

**Fig. S5.** XPS survey spectrum of exfoliated WSe<sub>2</sub> nanosheets.

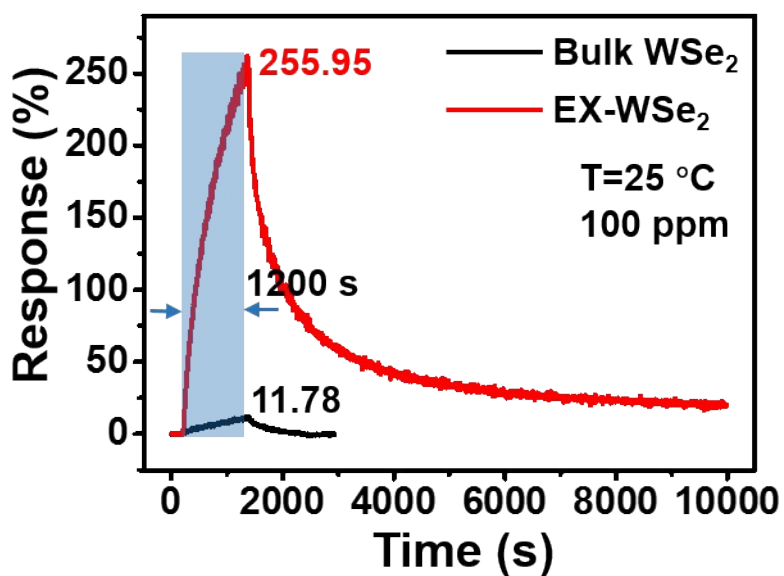

**Fig. S6.** The long-time response and recovery curves of bulk WSe<sub>2</sub> and exfoliated WSe<sub>2</sub> nanosheets upon exposure to 100 ppm DMMP at room temperature (25 °C).

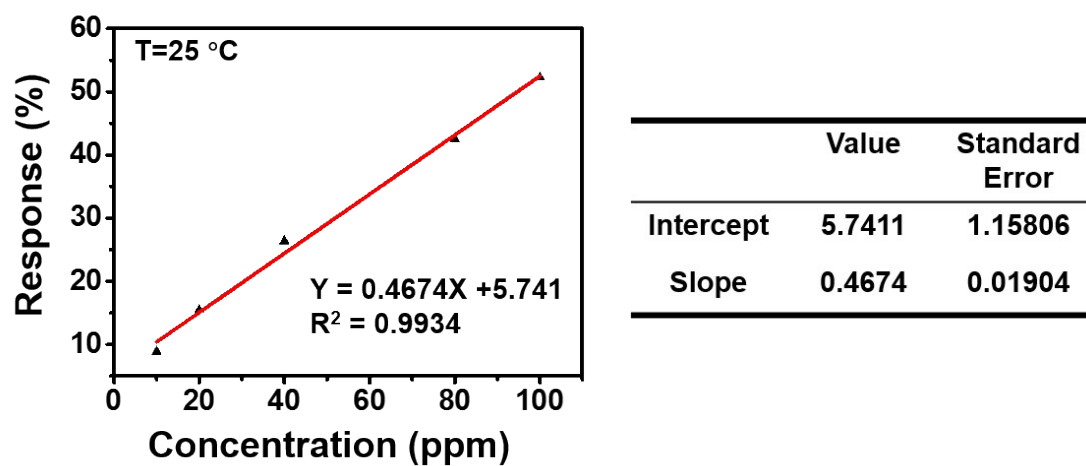

**Fig. S7.** The function fitting between the response value and DMMP concentration.
